# Supplementary material for: Design of hybrid multimodal poly(lactic-co-glycolic acid) polymer nanoparticles for neutrophil labeling, imaging and tracking
Source: Royal Society of Chemistry journal article supplement (doi:10.1039/c3nr04013e), 2013-01-01
Supplement: c3nr04013e.pdf [file c3nr04013e.pdf]

## Supporting Information

### Design of Hybrid Multimodal Poly(lactic-co-glycolic acid) Polymer Nanoparticles for Neutrophil Labeling, Imaging and Tracking

Yuan Qiu,<sup>a+</sup> Raghavendra Palankar,<sup>b+</sup> María Echeverría,<sup>a</sup> Nikolay Medvedev,<sup>b</sup>

Sergio Moya,<sup>\*a</sup> and Mihaela Delcea<sup>\*b</sup>

\*E-mail: [smoya@cicbiomagune.es](mailto:smoya@cicbiomagune.es); [mihaela.delcea@uni-greifswald.de](mailto:mihaela.delcea@uni-greifswald.de)

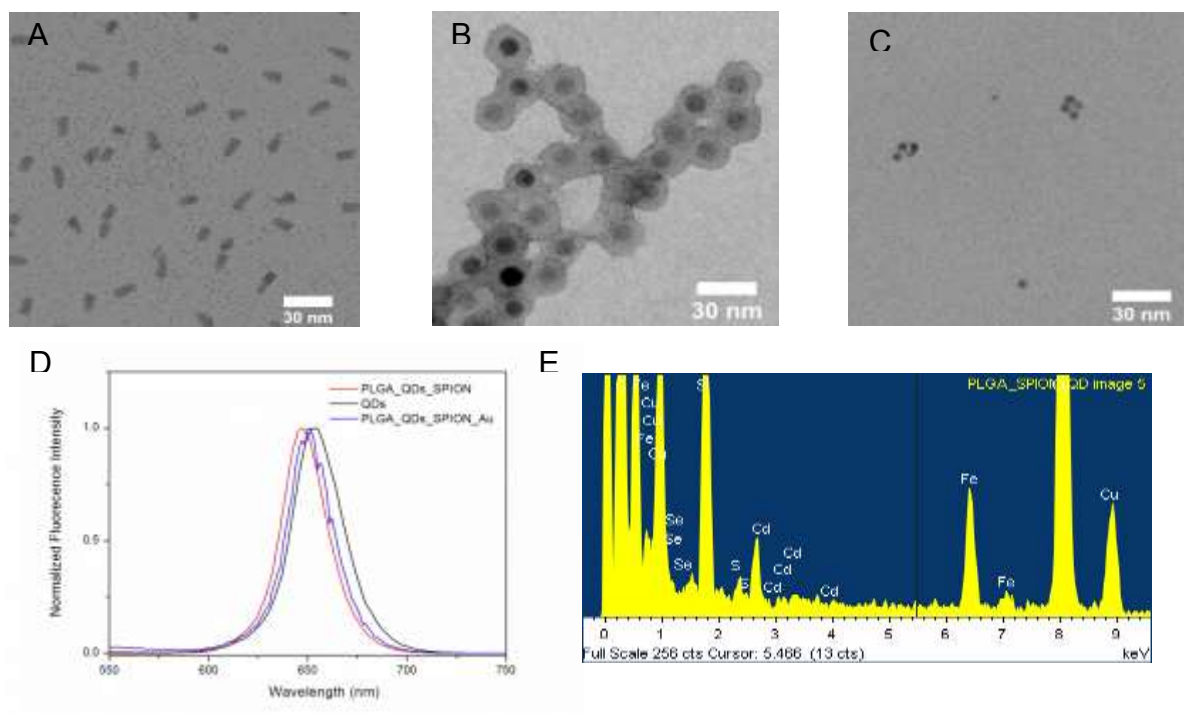

Figure S1. TEM images of QDs (A), SPIONs (B) and Au NPs (C). UV emission spectra of QDs and hybrid PLGA NPs (D) EDX spectrum of PLGA\_QD\_SPION NPs (E).

Table S1. Size and zeta potential of hybrid PLGA NPs.

| <b>Sample</b>        | <b>Average size (nm)</b> | <b>Zeta potential (mV)</b> |
|----------------------|--------------------------|----------------------------|
| PLGA_QD_SPION NPs    | 677.5±132.5              | 49.8±1.0                   |
| PLGA_QD_SPION_Au NPs | 891.7±25.6               | -14.5±1.19                 |
